1 **Quantifying rates of cell migration and cell proliferation in co-culture**  
2 **barrier assays reveals how skin and melanoma cells interact during**  
3 **melanoma spreading and invasion.**

4 Parvathi Haridas <sup>a,b,\*</sup>, Catherine J. Penington <sup>b,\*</sup>, Jacqui A. McGovern <sup>a</sup>, D. L. Sean  
5 McElwain <sup>a,b</sup>, Matthew J. Simpson <sup>a,b,†</sup>

6 <sup>a</sup> *Institute of Health and Biomedical Innovation, Queensland University of Technology (QUT), Kelvin*  
7 *Grove 4059, Australia.*

8 <sup>b</sup> *School of Mathematical Sciences, QUT, PO Box 2434, Brisbane 4001, Australia.*

9 \*These authors contributed equally to this work.

10 †Corresponding author [matthew.simpson@qut.edu.au](mailto:matthew.simpson@qut.edu.au)

11 **ABSTRACT**

12 Malignant spreading involves the migration of cancer cells amongst other native cell types.  
13 For example, *in vivo* melanoma invasion involves individual melanoma cells migrating  
14 through native skin, which is composed of several distinct subpopulations of cells. Here, we  
15 aim to quantify how interactions between melanoma and fibroblast cells affect the collective  
16 spreading of a heterogeneous population of cells *in vitro*. We perform a suite of circular  
17 barrier assays that includes: (i) monoculture assays with fibroblast cells; (ii) monoculture  
18 assays with SK-MEL-28 melanoma cells; and (iii) a series of co-culture assays initiated with  
19 three different ratios of SK-MEL-28 melanoma cells and fibroblast cells. Using  
20 immunostaining, detailed cell density histograms are constructed to illustrate how the two  
21 subpopulations of cells are spatially arranged within the spreading heterogeneous population.  
22 Calibrating the solution of a continuum partial differential equation to the experimental  
23 results from the monoculture assays allows us to estimate the cell diffusivity and the cell  
24 proliferation rate for the melanoma and the fibroblast cells, separately. Using the parameter  
25 estimates from the monoculture assays, we then make a prediction of the spatial spreading in  
26 the co-culture assays. Results show that the parameter estimates obtained from the  
27 monoculture assays lead to a reasonably accurate prediction of the spatial arrangement of the  
28 two subpopulations in the co-culture assays. Overall, the spatial pattern of spreading of the  
29 melanoma cells and the fibroblast cells is very similar in monoculture and co-culture  
30 conditions. Therefore, we find no clear evidence of any interactions other than cell-to-cell  
31 contact and crowding effects.

32 **KEYWORDS**

33 Cell migration; Cell proliferation; Melanoma; Fibroblast; Cancer.

34 **1. Introduction**

35 Melanoma is the deadliest form of skin cancer and arises due to the malignant transformation  
36 of melanocytes (Geller and Annas, 2003). In Australia, melanoma is reported to be the third  
37 most common cancer (Melanoma Institute Australia, 2016), and it is associated with high  
38 rates of mortality (Sneyd et al., 2013). However, if melanoma is detected early, before  
39 significant spreading occurs, prognosis after surgery is very good (Erdei et al., 2010; Faries  
40 and Ariyan, 2011). Therefore, understanding the mechanisms that drive melanoma spreading  
41 and invasion is very important.

42

43 Melanoma spreading takes place in a complex environment that contains many different  
44 kinds of cell types including: endothelial cells; keratinocytes; fibroblasts and immune cells  
45 (Cornil et al., 1991; Flach et al., 2011). Melanoma spreading in the dermis involves the  
46 movement of individual melanoma cells through an environment that also contains fibroblast  
47 cells (Li et al., 2007; Sriram et al., 2015). Previous experimental work suggests that  
48 melanoma cells can interact with fibroblast cells through diffusible factors, such as growth  
49 factors and cytokines, or by cell-to-cell contact and crowding (Flach et al., 2011; Goldstein et  
50 al., 2005; Labrousse et al., 2004; Ruiter et al., 2002; Zhou et al., 2015). In the experimental  
51 literature, these kinds of interactions are often broadly referred to as *cross-talk* between  
52 different subpopulations (Dvorankova et al., 2016; Ye et al., 2014). Although experimental  
53 studies indicate that fibroblasts can play a role in cancer progression, the precise details of  
54 how melanoma cells and fibroblast cells interact is not well understood (Kalluri and Zeisberg,  
55 2006; Li et al., 2003).

56

57 Metastatic melanoma cells are known to grow in colonies, that are sometimes called nests  
58 (Baraldi et al., 2013; Schwartz et al., 2008). The spatial expansion of these colonies is driven  
59 by the rate at which individual melanoma cells move, and the rate at which individual  
60 melanoma cells proliferate. Therefore, to understand how quickly a population of melanoma  
61 cells spreads through the surrounding environment, it is important to develop techniques that  
62 allow us to quantify the rates of cell migration and cell proliferation (Treloar et al., 2013).  
63 Previous *in vitro* studies examining the spatial spreading of populations of melanoma cells  
64 have focused on monoculture experiments that contain only melanoma cells (Cornil et al.,  
65 1991; Im et al, 2012; Justus et al., 2014; Treloar et al., 2013). To make these kinds of *in vitro*  
66 studies more relevant to the *in vivo* situation, it is important to investigate, and quantify, how  
67 the spatial spreading of melanoma cells is affected by interactions with other cells types, such  
68 as fibroblasts.

69

70 In this study we perform a series of monoculture and co-culture barrier assays to examine the  
71 spatial and temporal patterns of the spreading of a heterogeneous cell population that is  
72 composed of both melanoma cells and primary fibroblast cells. All experiments in this work  
73 make use of the metastatic melanoma cell line SK-MEL-28 (Fofaria and Srivastava, 2014),  
74 whereas the fibroblast cells are primary cells obtained from human donors. We first examine  
75 the spreading of melanoma cells and primary fibroblast cells separately, in a series of  
76 monoculture experiments. This allows us to quantify the rate of cell proliferation and the cell  
77 diffusivity for both melanoma cells and primary fibroblast cells, separately. Then, using our  
78 estimates of:

79

80

- 81 (i) the melanoma cell diffusivity;
- 82 (ii) the primary fibroblast cell diffusivity;
- 83 (iii) the melanoma cell proliferation rate; and,
- 84 (iv) the primary fibroblast cell proliferation rate,

85

86 we investigate whether the solution of an appropriate mathematical model describing the co-  
87 culture experiments, parameterised using data from the monoculture experiments, is able to  
88 predict the patterns of spreading in a suite of co-culture experiments where both cell types are  
89 present in varying ratios. The procedure that we describe can be used to quantify the extent  
90 to which the interactions between the two cell types affect the co-culture experiments.  
91 Overall, for the particular melanoma cell line that we consider, we find no clear evidence of  
92 any interactions other than cell-to-cell contact and crowding effects.

93

## 94 **2. Experimental Methods**

95

### 96 *2.1 Melanoma Cell Culture*

97

98 The metastatic melanoma cell line, SK-MEL-28, is cultured as described previously (Haridas  
99 et al., 2016). In brief, SK-MEL-28 melanoma cells are maintained in RPMI1640 medium  
100 (Thermo Scientific, Australia) supplemented with 10% fetal calf serum (FCS; Thermo  
101 Scientific), 2 mM L-glutamine (Thermo Scientific), 23 mM HEPES (Thermo Scientific),  
102 50 U/ml of penicillin and 50 µg/ml of streptomycin (Thermo Scientific). The melanoma cell

103 line is grown at 37 °C, in 5% CO<sub>2</sub> and 95% air, and the cell line is routinely screened for  
104 *mycoplasma* contamination.

105

## 106 2.2 Primary fibroblast culture

107

108 Human skin discards are obtained from abdominoplasty and breast reduction surgeries (Xie et  
109 al., 2010). The epidermis is removed, discarded and the remaining dermis is used for  
110 fibroblast isolation. All experimental procedures are approved by the QUT research ethics  
111 committee (approval number QUT HREC #1300000063) and St Andrew's hospital ethics  
112 committee (approval number: Uniting Care Health 2003/46). The dermis is finely minced  
113 with a scalpel blade and placed in a 0.05% w/v collagenase A type I (Thermo Scientific)  
114 solution prepared in Dulbecco's Modified Eagle's Medium (DMEM) (Thermo Scientific) at  
115 37 °C, in 5% CO<sub>2</sub> and 95% air for 24 hours. The dermal cell solution is centrifuged at 212 g  
116 for 10 minutes, and cells are seeded into T75 cm<sup>2</sup> flasks (Nunc<sup>®</sup>, Australia) in DMEM with  
117 10% FCS, 2 mM L-glutamine, 50 U/ml of penicillin and 50 µg/ml of streptomycin at 37 °C in  
118 5% CO<sub>2</sub> and 95% air.

119

## 120 2.3 Circular barrier assay

121

122 The spreading and proliferation of both primary fibroblast cells and SK-MEL-28 melanoma  
123 cells are examined using a two-dimensional circular barrier assay (Treloar et al., 2014). Two  
124 types of experiments are performed. Firstly, in the monoculture experiments, the barrier

125 assays are initialised with approximately 20,000 primary fibroblast cells (Fb monoculture), or  
126 approximately 20,000 SK-MEL-28 melanoma cells (SK monoculture). Secondly, in the co-  
127 culture experiments, assays are performed using three ratios of melanoma to fibroblast cells  
128 with the total number of initial cells held constant at approximately 20,000. We use three  
129 different ratios, and refer to these experiments as: co-culture 1; co-culture 2; and co-culture 3.  
130 Co-culture 1 experiments are initialised with approximately 15,000 primary fibroblast cells  
131 and approximately 5,000 SK-MEL-28 melanoma cells; co-culture 2 experiments are  
132 initialised with approximately 10,000 primary fibroblast cells and approximately 10,000 SK-  
133 MEL-28 melanoma cells; and, co-culture 3 experiments are initialised with approximately  
134 5,000 primary fibroblast cells and approximately 15,000 SK-MEL-28 melanoma cells. We  
135 note that all experiments are initialised with approximately 20,000 cells in total. This means  
136 that the initial density of cells is less than half of the carrying capacity density, and this  
137 allows the cell populations to spread as a monolayer (Treloar et al. 2013; Treloar et al. 2014)  
138 instead of piling up to form three-dimensional structures.

139

140 Clean and dried metal-silicone barriers, 6mm in diameter (Aix Scientifics, Germany), are  
141 placed in a 24 well tissue culture plate (Nunc®) over glass coverslips (ProSciTech, Australia)  
142 containing 500 µl of full Green's medium. The medium is made up of DMEM with Ham's  
143 F12 medium (Thermo Scientific) in a 3:1 v/v ratio, 10% FCS, 2 mM L-glutamine, 50 U/ml of  
144 penicillin, 50 µg/ml of streptomycin, 180 mM adenine (Sigma Aldrich, Australia), 1 µg/ml  
145 insulin, 0.1 µg/ml cholera toxin (Sigma Aldrich), 0.01% non-essential amino acid solution  
146 (Thermo Scientific), 5 µg/ml transferrin (Sigma Aldrich), 0.2 µM triiodothyronine (Sigma  
147 Aldrich), 0.4 µg/ml hydrocortisone (Sigma Aldrich) and 10 ng/ml human recombinant  
148 epidermal growth factor (EGF; Thermo Scientific). The cell suspension is carefully pipetted  
149 into the barrier to ensure the cells are as evenly distributed as possible. Cells are allowed to

150 attach to the plate for 2 hours in a humidified incubator at 37°C, 5% CO<sub>2</sub> and 95% air, before  
151 the barriers are carefully removed (Treloar et al., 2013). The cell layer is washed with serum  
152 free medium (SFM; culture medium without FCS) and the cells are cultured in full Green's  
153 medium. The culture plates are incubated at 37°C, 5% CO<sub>2</sub> and 95% air for  $t=0$ , 24 and 48  
154 hours. Each assay is performed in triplicates. Each assay is also repeated using primary  
155 fibroblast cells from three separate human donors.

156

#### 157 *2.4 Crystal violet staining*

158

159 The cells grown on coverslips are washed with phosphate buffered saline (PBS; Thermo  
160 Scientific) and fixed for 20 minutes at room temperature using 10% neutral buffered formalin  
161 (United Biosciences, Australia), followed by staining the cells in 0.01% v/v crystal violet  
162 (Sigma Aldrich) in PBS. The coverslips are rinsed with PBS to remove excess stain and are  
163 air-dried. Images of the entire spreading cell population are acquired using a stereo  
164 microscope (Nikon SMZ 800) fitted with a Nikon digital camera.

165

#### 166 *2.5 Immunofluorescence*

167

168 Cells grown on coverslips are fixed with 4% paraformaldehyde (Electron Microscopy  
169 Sciences, Australia) for 20 minutes at room temperature. Cell membranes are permeabilised  
170 with 0.1% v/v Triton X-100 (Merck Millipore, Australia) in PBS for 10 minutes, and the non-  
171 specific binding sites are blocked using 0.5% w/v bovine serum albumin (BSA) (Thermo



172 Scientific) in PBS for 10 minutes. This is followed by the addition of primary antibody, *S100*  
173 in a ratio of 1:2000 (Dako, Australia) for an hour, and the secondary antibody *Alexa Fluor*<sup>®</sup>  
174 555 in a ratio of 1:400 (Thermo Scientific) for an hour. Cells are washed with 0.5% BSA and  
175 the nuclei are stained with *dapi* in a ratio of 1:1000 (Sigma Aldrich) for 5 minutes. Coverslips  
176 are mounted on glass slides using ProLong<sup>®</sup> Gold Antifade mountant (Thermo Scientific).

177

### 178 3. Mathematical modelling methods

179

180 One way of providing further information about cancer progression is to interpret  
181 experimental observations using a mathematical model (Byrne, 2010). To quantify the role  
182 of various mechanisms acting in the monoculture and co-culture experiments we will use a  
183 continuum partial differential equation (PDE) model describing the collective spreading,  
184 proliferation and cell-to-cell crowding in a heterogeneous population of cells that is  
185 composed of two distinct subpopulations (Simpson et al. 2014). The PDE model is given by,

$$\frac{\partial C_{Fb}}{\partial t} = \frac{D_{Fb}}{r} \frac{\partial}{\partial r} \left( r \left[ \left[ 1 - \frac{S}{K} \right] \frac{\partial C_{Fb}}{\partial r} + \frac{C_{Fb}}{K} \frac{\partial S}{\partial r} \right] \right) + \lambda_{Fb} C_{Fb} \left( 1 - \frac{S}{K} \right), \quad (1)$$

$$\frac{\partial C_{SK}}{\partial t} = \frac{D_{SK}}{r} \frac{\partial}{\partial r} \left( r \left[ \left[ 1 - \frac{S}{K} \right] \frac{\partial C_{SK}}{\partial r} + \frac{C_{SK}}{K} \frac{\partial S}{\partial r} \right] \right) + \lambda_{SK} C_{SK} \left( 1 - \frac{S}{K} \right), \quad (2)$$

186 where  $C_{Fb}(r, t)$  and  $C_{SK}(r, t)$  are the density of fibroblast and melanoma cells, respectively,  
187 as a function of radial position,  $r$ , and time,  $t$ . The total cell density is given by  
188  $S(r, t) = C_{Fb}(r, t) + C_{SK}(r, t)$ , and the carrying capacity density is  $K$ . Since we consider  
189 circular barrier assays, in which the population of spreading cells always maintains a circular  
190 geometry over the entire duration of the experiment, Eq. (1)-(2) are written in terms of the  
191 radial coordinate,  $r$ , taking advantage of the axisymmetric geometry. Note that if there is just

192 a single population present, Eq. (1)-(2) reduces to the standard Fisher-Kolmogorov equation  
193 in radial geometry (Treloar et al. 2014).

194

195 There are five parameters in the co-culture model: (i)  $D_{Fb}$  is the diffusivity of the primary  
196 fibroblast cells; (ii)  $D_{SK}$  is the diffusivity of the SK-MEL-28 melanoma cells; (iii)  $\lambda_{Fb}$  is the  
197 proliferation rate of the primary fibroblast cells; (iv)  $\lambda_{SK}$  is the proliferation rate of the SK-  
198 MEL-28 melanoma cells; and (v)  $K$  is the carrying capacity density. Since the cells in our  
199 experiments spread as a monolayer, and the diameter of both the primary fibroblast cells and  
200 the SK-MEL-28 melanoma cells is approximately 20  $\mu\text{m}$  (Treloar et al. 2013; Treloar et al.  
201 2014), we estimate the carrying capacity density by assuming that the maximum density of  
202 cells corresponds to hexagonal packing of disks of diameter 20  $\mu\text{m}$ , giving  $K = 2.8 \times 10^{-3}$   
203 cells/ $\mu\text{m}^2$ . With this assumption there are now four unknown parameters in Eq. (1)-(2).

204

205 The PDE model can be used to simulate both co-culture and a monoculture barrier assays.  
206 To simulate a co-culture assay we specify appropriate non-zero initial conditions for both  
207  $C_{Fb}(r,0)$  and  $C_{SK}(r,0)$ , chosen to match the initial cell density in the co-culture experiments.  
208 Alternatively, to simulate a fibroblast monoculture assay, we set  $C_{SK}(r,0) = 0$  and specify  
209 some appropriate non-zero initial condition for  $C_{Fb}(r,0)$ . Similarly, to simulate a melanoma  
210 monoculture assay we set  $C_{Fb}(r,0) = 0$  and specify some appropriate non-zero initial  
211 condition for  $C_{SK}(r,0)$ .

212

213 Regardless of whether we use the PDE model to simulate a monoculture or co-culture assay,  
214 we always solve Eq.(1)-(2) numerically. Spatial derivatives are approximated using a central  
215 difference approximation on a uniformly spaced finite difference mesh, with mesh spacing  
216  $\Delta r$ . The resulting system of coupled nonlinear ordinary differential equations is solved  
217 using a backward Euler approximation, with time steps of duration  $\Delta t$ . The nonlinear  
218 ordinary differential equations are linearised using Picard iteration with a convergence  
219 tolerance of  $\varepsilon$  (Chapra and Canale, 1998).

220 Before applying Eq. (1)-(2) to our experimental data set, it is useful to briefly explain the  
221 origin of the PDE model and the underlying assumptions. The model was described and  
222 presented by us previously (Simpson et al. 2014). In that previous work we consider both a  
223 stochastic random walk process and the associated continuum limit PDE description. In  
224 brief, the lattice based random walk model describes the collective motion of a population of  
225 two potentially distinct subpopulations of cells. Cells in both subpopulations undergo nearest  
226 neighbour motility events, where cells attempt to step a distance of  $\Delta$ , at some specified  
227 constant rate. Here,  $\Delta$  corresponds to the average cell diameter. Potential motility events are  
228 unbiased so that the direction of movement is chosen with equal probability. Crowding  
229 effects are incorporated by ensuring that any potential motility event that would place a cell  
230 on an occupied site is aborted. The discrete model also allows cells to proliferate, at some  
231 other specified constant rate. A potential proliferation event will involve a cell placing a  
232 daughter cell, of the same subpopulation, on a randomly chosen nearest neighbour lattice site.  
233 Again, crowding effects are incorporated by ensuring that any potential proliferation event  
234 that would place a daughter cell on an occupied lattice site is aborted. The continuum limit  
235 description of this discrete model, in a radially symmetric geometry, is Eq. (1)-(2) (Simpson  
236 et al., 2014).

237

238 The system of PDEs, given by Eq. (1)-(2), incorporates a mathematical description of the  
239 cell-to-cell crowding effects that are explicitly defined in the discrete random walk model by  
240 aborting potential motility and proliferation events that would lead to more than one agent  
241 residing on any lattice site (Simpson et al., 2014). For example, the nonlinear diffusion terms  
242 in Eq. (1)-(2) describe hard-core exclusion in the discrete motility mechanism, whereas the  
243 nonlinear source terms in Eq. (1)-(2) describe hard-core exclusion in the discrete proliferation  
244 mechanism. The derivation of the continuum limit PDE description has been presented  
245 previously (Simpson et al., 2014), where we also show that the solutions of the continuum  
246 PDE description compare very well with averaged data from repeated stochastic simulations  
247 of the random walk model.

248

## 249 **4. Experimental results and discussion**

250

### 251 *4.1 Diameter of the spreading population*

252

253 We first investigate the spatial expansion of the cell populations over time. Results in Fig.  
254 1(a)-(i) show the spreading populations from  $t=0$  until  $t=48$  hours. To quantify the spatial  
255 spreading, we calculate the diameter of each spreading population at  $t=0$ , 24 and 48 hours. To  
256 achieve this we use ImageJ (2016) to automatically detect the position of the leading edge of  
257 the spreading population using the Sobel method (Treloar et al., 2013). ImageJ also provides  
258 an estimate of the area contained within the leading edge of the spreading population. Using  
259 this estimate of area, we assume that the spreading population remains approximately

260 circular, allowing us to convert the area estimate into an estimate of the equivalent circular  
261 diameter. The diameter of the spreading populations is shown in Fig. 1(j) where we see that  
262 there is an increase in the diameter with time in all cases. However, we observe that the rate  
263 of increase in the diameter in some experiments is different. For example, we observe that Fb  
264 monoculture experiments spread fastest, whereas the SK monoculture experiments spread  
265 slowest. In comparison, the co-culture experiments spread at an intermediate rate.

266 Although these results focusing on the rate at which the leading edge of the populations  
267 spread is insightful, they do not provide any information about how the primary fibroblast  
268 cells and the SK-MEL-28 melanoma cells are distributed throughout the spreading  
269 populations. To provide this additional information, we use a more sophisticated  
270 experimental approach.

271

#### 272 *4.2 Cell type identification in co-cultures*

273

274 To extend our initial investigation about the spatial expansion of the cell populations, we  
275 quantify the spatial distribution of primary fibroblast cells and SK-MEL-28 melanoma cells  
276 throughout the spreading populations. To achieve this we must distinguish the primary  
277 fibroblast cells from the SK-MEL-28 melanoma cells within the heterogeneous populations.  
278 The metastatic melanoma cell line, SK-MEL-28 can be reliably and exclusively identified  
279 using the *S100* marker (Haridas et al., 2016). However, it is challenging to identify primary  
280 fibroblast cells in a heterogeneous population because many because fibroblast markers, like  
281 *vimentin* and *alpha smooth muscle actin*, are also expressed by other migrating cell types  
282 present in the population (Kalluri and Zeisberg, 2006; Marsh et al., 2013; Sugimoto et al.,

283 2006). To deal with this complication we use *dapi* to stain the cell nuclei of all cells,  
284 capturing both the SK-MEL-28 melanoma cells and the primary fibroblast cells. By counting  
285 the number of *dapi*-positive cells and subtracting the number of *S100* positive cells, we are  
286 able to reliably estimate the number of primary fibroblast cells in each image.

287

288 Images showing the entire spreading populations are superimposed with an immunostained  
289 transect that passes through the centre of the cell population in Fig. 2. These immunostained  
290 transects allow us to extract detailed information about the spatial distribution of primary  
291 fibroblast cells and SK-MEL-28 melanoma cells in each experiment. Greyscale images  
292 showing the entire spreading population at  $t=24$  and 48 hours are shown in Fig. 2(a), (c), (e),  
293 (g), (i), (k), (m), (o), (q) and (s). The central region of the transect, as indicated, is magnified  
294 and shown in Fig. 2(b), (d), (f), (h), (j), (l), (n), (p), (r) and (t). Our results in Fig. 2 show that  
295 we are able to clearly and reliably identify the two different cell types in the experiments. We  
296 are confident in our results because there are no *S100* positive cells in the primary fibroblast  
297 monoculture experiment (Fig. 2(b), (d)), and we observe an increasing proportion of *S100*  
298 positive cells in co-culture 3 (Fig. 2(m)-(p)), compared to co-culture 2 (Fig. 2(i)-(l)).  
299 Similarly, we observe an increasing proportion of *S100* positive cells in co-culture 2 (Fig.  
300 2(i)-(l)), compared to co-culture 1 (Fig. 2(e)-(h)).

301

### 302 *4.3 Construction of cell density histograms*

303

304 To quantify how the two subpopulations of cells are spatially distributed within the  
305 heterogeneous spreading populations, we construct cell density histograms. To do this, we

306 count the number of cells in many equally spaced subregions across each transect, as shown  
307 in Fig. 3(a). We use immunofluorescence to identify primary fibroblast cells and SK-MEL-28  
308 melanoma cells as described in Section 4.2, and as shown in Fig. 3(b)-(d). An estimate of the  
309 cell density for each cell type along the transect is calculated by counting the number of  
310 primary fibroblast cells and the number of SK-MEL-28 melanoma cells in each subregion,  
311 and dividing these numbers by the area of the subregion. A histogram showing cell density as  
312 a function of position is generated for each experimental replicate in each experimental  
313 condition. Averaging the histograms from each experimental replicate gives an averaged  
314 histogram, as shown in Fig. 3(e). The raw data showing the cell density information for each  
315 experimental replicate is also provided (Supplementary Material-1).

316

317 A series of averaged cell density histograms at  $t=0$ , 24 and 48 hours are shown in Fig. 4. Each  
318 histogram shows the average density of cells across the entire transect. The radial position is  
319 given by  $r>0$ . The centre of the spreading cell population corresponds to  $r=0$ , and the  
320 population spreads in both directions, away from the centre. The blue section in the  
321 histograms indicate the average density of primary fibroblast cells, the red section shows the  
322 average density of SK-MEL-28 melanoma cells, and the total height of the histogram shows  
323 the average total cell density.

324

325 Results in Fig. 4(a), (d), (g), (j) and (m) show the histograms at  $t=0$ . These results confirm  
326 that all barrier assays are initialised such that the total population of cells is approximately  
327 uniformly distributed across the transect, with a total cell density of approximately  
328  $1 \times 10^{-3}$  cells/ $\mu\text{m}^2$ , which is less than half the carrying capacity density of these cells in a  
329 monolayer (Supplementary Material-2). However, the ratio of melanoma to primary

330 fibroblast cells differs in Fig. 4(a), (d), (g), (j) and (m). For example, the profile in Fig. 4(a)  
331 contains only primary fibroblast cells, the profile in Fig. 4(m) contains only melanoma cells,  
332 and the profiles in Fig. 4(d), (g) and (j) contain both melanoma and primary fibroblast cells  
333 with an increasing ratio of melanoma to fibroblast cells, respectively.

334

335 Our results in each row in Fig. 4 show how the cell density changes with time. The middle  
336 column of results corresponds to  $t=24$  hours, and the right-most column corresponds to  $t=48$   
337 hours. Comparing results in Fig. 4(c) and Fig. 4(o) shows that the cells in the Fb monoculture  
338 experiments spread further than the cells in the SK monoculture experiments, and result this  
339 is consistent with the leading edge results in Fig. 1. Furthermore, comparing the shape of the  
340 cell density histograms in Fig. 4(c) and Fig. 4(o) shows that the leading edge of the cell  
341 density profile is sharper in the SK monoculture experiments than for the Fb monoculture  
342 experiments. While we observe differences in the rate of the spatial extent of the spreading of  
343 the two monoculture experiments, we observe that the increase in cell density towards the  
344 centre of the population, at  $r=0$ , is very similar. For example, at  $t=0$  the cell density at the  
345 centre of both monoculture experiments is approximately  $1 \times 10^{-3}$  cells/ $\mu\text{m}^2$ , and after 48  
346 hours the cell density at the centre of both monoculture experiments has approximately  
347 doubled to a density of  $2 \times 10^{-3}$ - $2.5 \times 10^{-3}$  cells/ $\mu\text{m}^2$ .

348

349 Comparing the time evolution of the cell density patterns in the co-culture experiments with  
350 the monoculture experiments suggests that there are minimal differences in the behaviour of  
351 the monoculture and co-culture experiments. For example, co-culture 1 that is initiated with  
352 approximately 15,000 primary fibroblast cells and approximately 5,000 SK-MEL-28  
353 melanoma cells behaves in a very similar way to the Fb monoculture experiment in terms of



354 both the spatial extent of the spreading of the total population and the total increase in the  
355 cell density towards the centre of the spreading population. Similarly, co-culture 3, that is  
356 initiated with approximately 5,000 primary fibroblast cells and approximately 15,000 SK-  
357 MEL-28 melanoma cells behaves in a very similar way unto the SK monoculture experiment  
358 in terms of both the spatial extent of the spreading of the total population and the total  
359 increase in the cell density towards the centre of the spreading population. Results for co-  
360 culture 2 lie between co-culture 1 and co-culture 3. An interesting feature of co-culture 1 and  
361 co-culture 2 is that at both  $t=24$  and  $t=48$  hours, we see that the primary fibroblast cells  
362 dominate the total population right at the leading edge of the heterogeneous population of  
363 cells. This is consistent with our observation that the primary fibroblast cells spread faster  
364 than the SK-MEL-28 melanoma cells in the monoculture experiments.

365

366 Now that we have presented, and discussed, the cell density histograms for the monoculture  
367 and co-culture experiments, we will further explore the similarities and differences between  
368 the experiments by calibrating a mathematical model to these data. Combining our  
369 experimental results with a mathematical model will allow us to explore, in more detail, the  
370 question of whether the primary fibroblast cells and/or the SK-MEL-28 melanoma cells  
371 behave differently when grown in monoculture or in co-culture conditions.

372

373

374

375

376

## 377 5. Mathematical results and discussion

378

### 379 5.1 Estimating parameters for the monoculture experiments

380

381 Since fibroblast cells and melanoma cells are cultured separately in the monoculture  
382 experiments, the coupled model, given by Eq. (1)-(2), uncouples to give

$$\frac{\partial C_{Fb}}{\partial t} = \frac{D_{Fb}}{r} \frac{\partial}{\partial r} \left( r \frac{\partial C_{Fb}}{\partial r} \right) + \lambda_{Fb} C_{Fb} \left( 1 - \frac{C_{Fb}}{K} \right), \quad (3)$$

$$\frac{\partial C_{SK}}{\partial t} = \frac{D_{SK}}{r} \frac{\partial}{\partial r} \left( r \frac{\partial C_{SK}}{\partial r} \right) + \lambda_{SK} C_{SK} \left( 1 - \frac{C_{SK}}{K} \right). \quad (4)$$

383 Equations (3)-(4) are two, uncoupled, single-species Fisher-Kolmogorov equations in radial  
384 coordinates that we will use to describe the Fb monoculture and SK monoculture  
385 experiments, respectively. There are four parameters to be estimated:  $D_{Fb}$ ;  $D_{SK}$ ;  $\lambda_{Fb}$  and  $\lambda_{SK}$ .

386 We now explain how these parameters can be estimated separately, using data in Fig. 4(a)-(c)  
387 for the Fb monoculture experiment, and using data in Fig. 4(m)-(o) for the SK monoculture  
388 experiment. Following the approach of Johnston et al. (2015), we note that in the central  
389 region of the monoculture experiments, where  $r < 1425 \mu\text{m}$ , the cell density profile is  
390 approximately spatially uniform in both the fibroblast monoculture and the melanoma  
391 monoculture (Fig. 4). This region approximately corresponds to the middle third of the  
392 spreading population, and hence this region is well away from the leading edge of the  
393 spreading populations. Since, locally in the centre of the fibroblast monoculture experiment  
394 we have  $\partial C_{Fb} / \partial r \approx 0$ , and locally in the centre of the melanoma monoculture experiment we  
395 have  $\partial C_{SK} / \partial r \approx 0$ , the two uncoupled PDEs, Eq. (3)-(4), simplify to two uncoupled ordinary  
396 differential equations (ODE) that can be written as

$$\frac{dC_{Fb}}{dt} = \lambda_{Fb} C_{Fb} \left(1 - \frac{C_{Fb}}{K}\right), \quad (5)$$

$$\frac{dC_{SK}}{dt} = \lambda_{SK} C_{SK} \left(1 - \frac{C_{SK}}{K}\right). \quad (6)$$

397 The solutions of Eq. (5)-(6) are

$$C_{Fb}(t) = \frac{KC_{Fb}(0) \exp(\lambda_{Fb} t)}{K + C_{Fb}(0)[\exp(\lambda_{Fb} t) - 1]}, \quad (7)$$

$$C_{SK}(t) = \frac{KC_{SK}(0) \exp(\lambda_{SK} t)}{K + C_{SK}(0)[\exp(\lambda_{SK} t) - 1]}, \quad (8)$$

398 where  $C_{Fb}(0)$  is the initial density of the fibroblast cells in the central region of the Fb  
 399 monoculture experiments, and  $C_{SK}(0)$  is the initial density of the melanoma cells in the  
 400 central region of the SK monoculture experiments. Estimates of  $\lambda_{Fb}$  and  $\lambda_{SK}$  are obtained by  
 401 choosing these parameters so that  $C_{Fb}(t)$  and  $C_{SK}(t)$ , given by Eq. (7)-(8), match the  
 402 experimental data from the central region of the fibroblast monoculture experiments and the  
 403 melanoma monoculture experiments, respectively (Supplementary Material-2). In summary,  
 404 matching these solutions to our experimental data gives us a range of estimates:  
 405  $0.02 \leq \bar{\lambda}_{Fb} \leq 0.04$  /hour and  $0.03 \leq \bar{\lambda}_{SK} \leq 0.05$  /hour. Here we use the overbar notation to  
 406 indicate the least-squares estimates of the parameters, and the range of estimates corresponds  
 407 to the sample mean plus or minus one sample standard deviation calculated using the three  
 408 identically prepared experimental replicates of the monoculture experiments. It is interesting  
 409 to note that these estimates of the proliferation rate for the melanoma cells and the fibroblast  
 410 cells are approximately equal. Furthermore, the proliferation rates correspond to a doubling  
 411 time of approximately 23 hours, and this is consistent with previous results (Treloar et al.  
 412 2013).

413

414 Given our estimates of  $\lambda_{Fb}$  and  $\lambda_{SK}$ , we solve Eq. (3)-(4) across the entire domain,  $0 < r <$   
415  $4350 \mu\text{m}$ , and match the numerical solution of each uncoupled PDE with the averaged cell  
416 density profiles across the entire domain for both monoculture experiments. Setting the  
417 proliferation rates to be in the middle of the range previously identified ( $\bar{\lambda}_{Fb} = 0.03/\text{hour}$  and  
418  $\bar{\lambda}_{SK} = 0.04 / \text{hour}$ ), we obtain estimates of  $\bar{D}_{Fb} \approx 1200 \mu\text{m}^2/\text{hour}$ , and  $\bar{D}_{SK} \approx 170 \mu\text{m}^2/\text{hour}$   
419 (Supplementary Material-2). Unlike our estimates of the proliferation rates, the estimate of  
420 the cell diffusivity for the fibroblast cells is an order of magnitude higher than the estimate of  
421 the cell diffusivity for the melanoma cells. Our estimate for the cell diffusivity of the human  
422 primary fibroblast cells is very similar to previous estimates of the cell diffusivity for 3T3  
423 mouse fibroblast cells (Treloar et al. 2014). Furthermore, our estimate of the cell diffusivity  
424 for the SK-MEL-28 melanoma cells is similar to previous estimates for other metastatic  
425 melanoma cell lines (Treloar et al. 2013).

426

## 427 *5.2 Predicting collective cell spreading in the co-culture experiments*

428

429 Given our parameter estimates from the monoculture experiments, we are interested to  
430 investigate whether the solution of the coupled co-culture model, Eq. (1)-(2), can accurately  
431 predict the spatial and temporal patterns of spreading in the co-culture experiments when  
432 parameterised in the same way. Examining this question will provide insight into whether  
433 the fibroblast and/or melanoma cells behave differently in monoculture than they do in co-  
434 culture. In summary, if we can find a unique choice of  $D_{Fb}$ ;  $D_{SK}$ ;  $\lambda_{Fb}$  and  $\lambda_{SK}$  for which:

435

- 436 (i) the solution of the coupled system, Eq. (1)-(2), matches the experimental data  
437 for all three co-culture assays;
- 438 (ii) the solution of Eq. (3) matches the experimental data for the fibroblast  
439 monoculture assay; and
- 440 (iii) the solution of Eq. (4) matches the experimental data for the melanoma  
441 monoculture assay,

442

443 it would be reasonable to conclude that the migratory and proliferative behaviour of the  
444 melanoma and fibroblast cells appears to be independent of whether these two cell types are  
445 cultured separately or together. In contrast, if we must choose very different parameter  
446 values to match the monoculture experiments compared to the parameter values required to  
447 match the co-culture experiments, then our results would suggest that the cells behave very  
448 differently in monoculture and co-culture environments.

449

450 Results in Fig. 5 compare the spatial and temporal evolution of the two monoculture assays  
451 and the three co-culture assays together with the solution of the appropriately parameterised  
452 mathematical models. Using our parameter estimates from the monoculture experiments as  
453 an initial estimate, we manually adjusted the parameters and find that setting  $D_{Fb} \approx 1200$   
454  $\mu\text{m}^2/\text{hour}$ ;  $D_{SK} \approx 170 \mu\text{m}^2/\text{hour}$ ;  $\lambda_{Fb} = 0.03/\text{hour}$  and  $\lambda_{SK} = 0.03/\text{hour}$  leads to a  
455 reasonably accurate match across both the two monoculture assays and the three co-culture  
456 assays (Supplementary Material-2). Given that we are able to match both the monoculture  
457 and co-culture experiments using a single combination of parameters, this suggests that the  
458 only interactions necessary to explain the experimental observations are cell-to-cell contact  
459 and crowding effects. In particular, no additional crosstalk mechanisms, such as interactions

460 mediated by the production of signalling factors, is required to explain our experimental  
461 observations.

462

## 463 **6. Conclusion**

464

465 Many *in vitro* studies examining the spatial spreading of cancer cells use monoculture  
466 experiments (Kramer et al., 2013; Liao et al., 2013; Treloar et al., 2013). However, these  
467 monoculture experiments are unrealistic in the sense that the spreading cancer cells are not  
468 subject to interactions with other cell types as would occur *in vivo*. To address this limitation,  
469 our approach to investigate the spatial spreading of a melanoma cell population is to examine  
470 a suite of monoculture and co-culture circular barrier assays. Our monoculture experiments  
471 involve studying both primary fibroblast cells and SK-MEL-28 melanoma cells separately,  
472 while our co-culture experiments use three ratios of both cell types in the same experiment.  
473 All of our experiments are initialised by placing approximately 20,000 cells into the barrier,  
474 and we examine the collective spreading over a period of 48 hours. To quantify how these  
475 heterogeneous populations of cells spread over time we: (i) measure the diameter of each  
476 expanding cell population; (ii) identify individual cell types in each expanding population;  
477 (iii) count the number of primary fibroblast cells and SK-MEL-28 melanoma cells in a series  
478 of transects across each expanding cell population; and (iv) construct cell density histograms  
479 to show the spatial arrangements of each cell type in each expanding cell population.

480

481 Previous experimental studies suggest that interactions between fibroblast and melanoma  
482 cells can lead to an increase in rates of collective spreading when these two cell types are in

483 contact (Cornil et al., 1991; Flach et al., 2011). However, these previous studies do not make  
484 detailed measurements of spatial and temporal arrangements of cells within the spreading  
485 population, and they do not consider varying the initial ratio of fibroblast cells to melanoma  
486 cells. To provide more information about the interaction between melanoma cells and  
487 fibroblast cells, we perform co-culture experiments using three different initial ratios of cells,  
488 and we make detailed measurements about the spatial and temporal arrangements of both  
489 subpopulations within the heterogeneous population as it spreads and grows. In summary,  
490 our experimental results indicate that the influence of primary fibroblast cells on SK-MEL-28  
491 melanoma cell growth and spatial expansion in a two-dimensional circular barrier assay is  
492 minimal. To provide additional information about this apparent lack of interaction, we also  
493 calibrate a mathematical model to our experimental data.

494

495 Our approach for parameterizing the mathematical model is novel. By first estimating the  
496 cell diffusivity and cell proliferation rate for the primary fibroblast cells and SK-MEL-28  
497 melanoma cells separately in monoculture, we find that the parameter estimates are consistent  
498 with previously published estimates for mouse fibroblast cells and other metastatic melanoma  
499 cell lines (Treloar et al. 2013; Treloar et al. 2014). Therefore, we are confident in our  
500 estimates of the cell diffusivity and cell proliferation rate in monocultures because they are  
501 consistent with previously published data for similar experiments. Then, to address the  
502 question of whether cells in monoculture behave similarly, or differently, to cells in co-  
503 culture, we investigate whether the solution of the co-culture mathematical model,  
504 parameterised using estimates from the monoculture experiments, can genuinely predict the  
505 behaviour of the co-culture experiments. Since we find that a fixed choice of parameters, that  
506 is very similar to the estimates from the monoculture experiments, can predict both the spatial  
507 and temporal patterns of collective spreading in the two monoculture experiments, and all

508 three co-culture experiments, we conclude that the spreading and growth patterns observed  
509 for primary fibroblast cells and SK-MEL-28 melanoma cells are not affected by growing  
510 them in monoculture or co-culture.

511

512 Our approach is to compare the spatial spreading of two different cell types in both  
513 monoculture and co-culture circular barrier assays to quantify the rates of cell migration and  
514 the rates of cell proliferation for each cell type. This approach is novel because most  
515 combined experimental and mathematical modelling studies focus on monoculture  
516 experiments alone (Kramer et al., 2013; Treloar et al., 2013). However, it is possible to  
517 explore other alternative experiments to further extend our work. This includes performing  
518 additional experiments to examine the rates of spatial spreading in different cell lines. For  
519 example, it could be of interest to repeat our work using other kinds of melanoma cell lines  
520 including cell lines from earlier stages of the disease, such as melanoma cells associated with  
521 the radial growth phase or the vertical growth phase (Haridas et al., 2016). This could be an  
522 important consideration because our current work focuses on examining potential interactions  
523 between fibroblast cells and SK-MEL-28 melanoma cells only. Since the SK-MEL-28 cell  
524 line is associated with the metastatic phase (Fofaria and Srivastava, 2014; Haridas et al.  
525 2016), it is possible that these cells have progressed beyond being influenced by fibroblasts.  
526 Alternatively, if our experiments and analysis was repeated using melanoma cells from  
527 earlier stages, it is conceivable that these melanoma cells might be more responsive to the  
528 presence of fibroblasts.

529

530 Other options to extend our work might involve incorporating further types of cells to make  
531 the co-culture experiments more realistic. For example, it is of interest to include both



532 primary fibroblast cells and primary keratinocyte cells in a co-culture experiment with  
533 melanoma cell lines. However, this kind of extension is difficult because we would need to  
534 specifically identify three different cell types to understand how the three different  
535 subpopulations are spatially arranged. Therefore, we leave this extension for future  
536 consideration.

537

### 538 **Acknowledgments**

539

540 We acknowledge financial support from the Australian Research Council (FT130100148,  
541 DP140100249), and we thank Professor Brian Gabrielli for providing us with the SK-MEL-  
542 28 melanoma cell line.

543 **References**

- 544 1. Baraldi, M. M., Alemi, A. A., Sethna, J. P., Caracciolo, S., Porta, C. A. L. M., Zapperi,  
545 S., 2013. Growth and form of melanoma cell colonies. *J. Stat. Mech-Theory-E.* 2013,  
546 P02032.
- 547 2. Byrne, H. M., 2010. Dissecting cancer through mathematics: from the cell to the animal  
548 model. *Nat. Rev. Cancer.* 10, 221-230.
- 549 3. Cornil, I., Theodorescu, D., Man, S., Herlyn, M., Jambrosic, J., Kerbel, R. S., 1991.  
550 Fibroblast cell interactions with human melanoma cells affect tumor cell growth as a  
551 function of tumor progression. *P. Natl. Acad. Sci. USA.* 88, 6028-6032.
- 552 4. Chapra, S. C., Canale, R. P., 1998. Numerical methods for engineers, third ed. McGraw-  
553 Hill, Singapore.
- 554 5. Dvorankova, B., Szabo, P., Kodet, O., Strnad, H., Kolar, M., Lacina, L., Krejci, E.,  
555 Nanka, O., Sedo, A., Smetana, K. Jr., 2016. Intercellular crosstalk in human malignant  
556 melanoma. *Protoplasma.* <http://dx.doi.org/10.1007/s00709-016-1038-z> (in press).
- 557 6. Erdei, E., Torres, S. M., 2010. A new understanding in the epidemiology of melanoma.  
558 *Expert Rev. Anticanc.* 10, 1811-1823.
- 559 7. Faries, M. B., Ariyan, S., 2011. Current surgical treatment in melanoma. *Curr. Prob.*  
560 *Cancer.* 35, 173-184.
- 561 8. Flach, E. H., Rebecca, V. W., Herlyn, M., Smalley, K. S., Anderson, A. R. A., 2011.  
562 Fibroblasts contribute to melanoma tumor growth and drug resistance. *Mol. Pharm.* 8,  
563 2039-2049.
- 564 9. Fofaria, N., Srivastava, S. K., 2014. Critical role of STAT3 in melanoma metastasis  
565 through anoikis resistance. *Oncotarget.* 5, 7051-7064.
- 566 10. Geller, A. C., Annas, G. D., 2003. Epidemiology of melanoma and nonmelanoma skin  
567 cancer. *Semin. Oncol. Nurs.* 19, 2-11.

- 568 11. Goldstein, L. J., Chen, H., Bauer, R. J., Bauer, S. M., Velazquez, O. C., 2005. Normal  
569 human fibroblasts enable melanoma cells to induce angiogenesis in type I collagen.  
570 Surgery. 138, 439-449.
- 571 12. Haridas, P., McGovern, J. A., Kashyap, A. S., McElwain, D. L. S., Simpson, M. J., 2016.  
572 Standard melanoma-associated markers do not identify the MM127 metastatic melanoma  
573 cell line. Sci. Rep. 6, 24569.
- 574 13. Im, Y-S., Ryu, Y-K., Moon, E-Y., 2012. Mouse melanoma cell migration is dependent on  
575 production of reactive oxygen species under normoxia condition. Biomol. Ther. 20, 165-  
576 170.
- 577 14. ImageJ, ImageJ User Guide: Research Services Branch, National Institute of Health.  
578 <<https://imagej.nih.gov/ij/docs/guide/146-29.html>> (November 2016).
- 579 15. Johnston, S. T., Shah, E. T., Chopin, L. K., McElwain, D. L. S., Simpson, M. J., 2015.  
580 Estimating cell diffusivity and cell proliferation rate by interpreting IncuCyte ZOOM™  
581 assay data using the Fisher-Komogorov model. BMC Syst. Biol. 9, 38.
- 582 16. Justus, C. R., Leffler, N., Ruiz-Echevarria, M., Yang, L. V., 2014. *In vitro* cell migration  
583 and invasion assays. J. Vis. Exp. 88, e51046.
- 584 17. Kalluri, R., Ziesberg, M., 2006. Fibroblasts in cancer. Nat. Rev. Cancer. 6, 392-401.
- 585 18. Kramer, N., Walzl, A., Unger, C., Rosner, M., Krupitza, G., Hengstschlager, M.,  
586 Dollznig, H., 2013. *In vitro* cell migration and invasion assays. Mutat. Res. 752, 10-24.
- 587 19. Labrousse, A-L., Ntayi, C., Hornebeck, W., Bernard, P., 2004. Stromal reaction in  
588 cutaneous melanoma. Crit. Rev. Oncol. Hemat. 49, 269-275.
- 589 20. Li, G., Satyamoorthy, K., Meier, F., Berking, C., Bogenrieder, T., Herlyn, M., 2003.  
590 Function and regulation of melanoma-stromal fibroblast interactions: when seeds meet  
591 soil. Oncogene. 22, 3162-3171.

- 592 21. Li, H., Fan, X., Houghton, J., 2007. Tumor microenvironment: the role of the tumor  
593 stroma in cancer. *J. Cell. Biochem.* 101, 805-815.
- 594 22. Liao, S., Deng, D., Zhang, W., Hu, X., Wang, W., Wang, H., Lu, Y., Wang, S., Meng, L.,  
595 Ma, D., 2013. Human papillomavirus 16/18 E5 promotes cervical cancer cell  
596 proliferation, migration and invasion *in vitro* and accelerates tumor growth *in vivo*. *Oncol.*  
597 *Rep.* 29, 95-102.
- 598 23. Marsh, T., Pietras, K., McAllister, S. S., 2013. Fibroblasts as architects of cancer  
599 pathogenesis. *Biochim. Biophys. Acta.* 1832, 1070-1078.
- 600 24. Melanoma Institute Australia. <<https://www.melanoma.org.au/>> (November 2016).
- 601 25. Ruitter, D., Bogenrieder, T., Elder, D., Herlyn, M., 2002. Melanoma–stroma interactions:  
602 structural and functional aspects. *Lancet Oncol.* 3, 35-43.
- 603 26. Simpson, M. J., Haridas, P., McElwain, D. L. S., 2014. Do pioneer cells exist? *PLoS One.*  
604 9, e85488.
- 605 27. Schwartz, M. A., McRoberts, K., Coyner, M., Andarawewa, K. L., Frierson, H. F. Jr.,  
606 Sanders, J. M., Swenson, S., Markland, F., Conaway, M. R., Theodorescu, D., 2008.  
607 Integrin agonists as adjuvants in chemotherapy for melanoma. *Clin. Cancer Res.* 14,  
608 6193-6197.
- 609 28. Sneyd, M. J., Cox, B., 2013. A comparison of trends in melanoma mortality in New  
610 Zealand and Australia: the two countries with the highest melanoma incidence and  
611 mortality in the world. *BMC Cancer.* 13, 372.
- 612 29. Sriram, G., Bigliardi, P. L., Bigliardi-Qi, M., 2015. Fibroblast heterogeneity and its  
613 implications for engineering organotypic skin models *in vitro*. *Eur. J. Cell Biol.* 94, 483-  
614 512.
- 615 30. Sugimoto, H., Mundel, T. M., Kieran, M. W., Kalluri, R., 2006. Identification of  
616 fibroblast heterogeneity in the tumor microenvironment. *Cancer Biol. Ther.* 5, 1640-1646.

- 617 31. Treloar, K. K., Simpson, M. J., Haridas, P., Manton, K. J., Leavesley, D. I., McElwain, D.  
618 L. S., Baker, R. E., 2013. Multiple types of data are required to identify the mechanisms  
619 influencing the spatial expansion of melanoma cell colonies. *BMC Syst. Biol.* 7,137.
- 620 32. Treloar, K. K., Simpson, M. J., McElwain, D. L. S., Baker, R. E., 2014. Are *in vitro*  
621 estimates of cell diffusivity and cell proliferation rate sensitive to assay geometry? *J.*  
622 *Theor. Biol.* 356, 71-84.
- 623 33. Xie, Y., Rizzi, S. C., Dawson, R., Lynam, E., Richards, S., Leavesley, D. I., Upton, Z.,  
624 2010. Development of a three-dimensional human skin equivalent wound model for  
625 investigating novel wound healing therapies. *Tissue Eng. PT C-Meth.* 16, 1111-1123.
- 626 34. Ye, J., Wu, D., Wu, P., Chen, Z., Huang, J., 2014. The cancer stem cell niche: cross talk  
627 between cancer stem cells and their microenvironment. *Tumor Biol.* 35, 3945-3951.
- 628 35. Zhou, L., Yang, K., Andl, T., Wickett, R. R., Zhang, Y., 2015. Perspective of targeting  
629 cancer-associated fibroblasts in melanoma. *J. Cancer.* 6, 717-726.

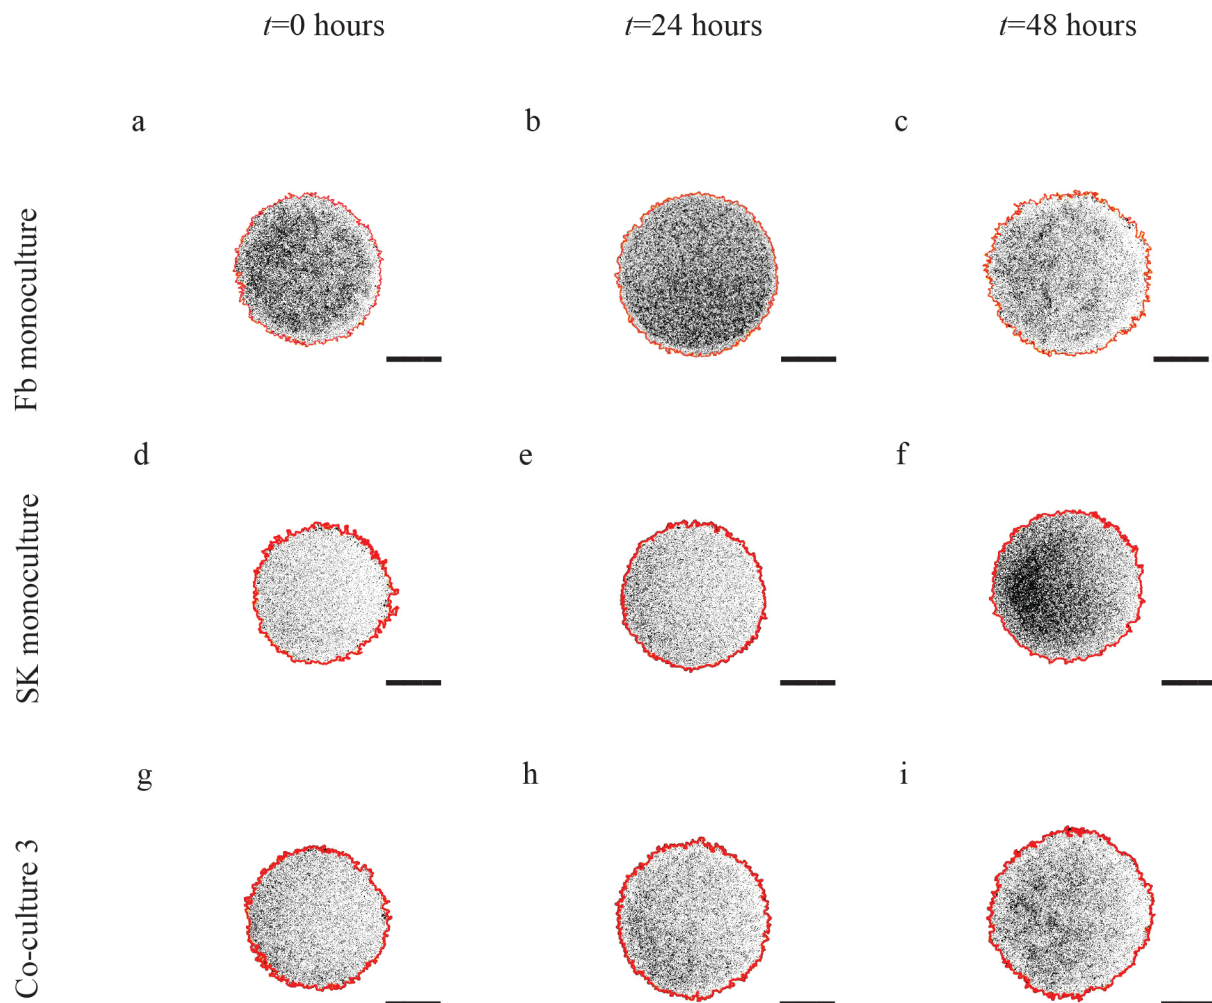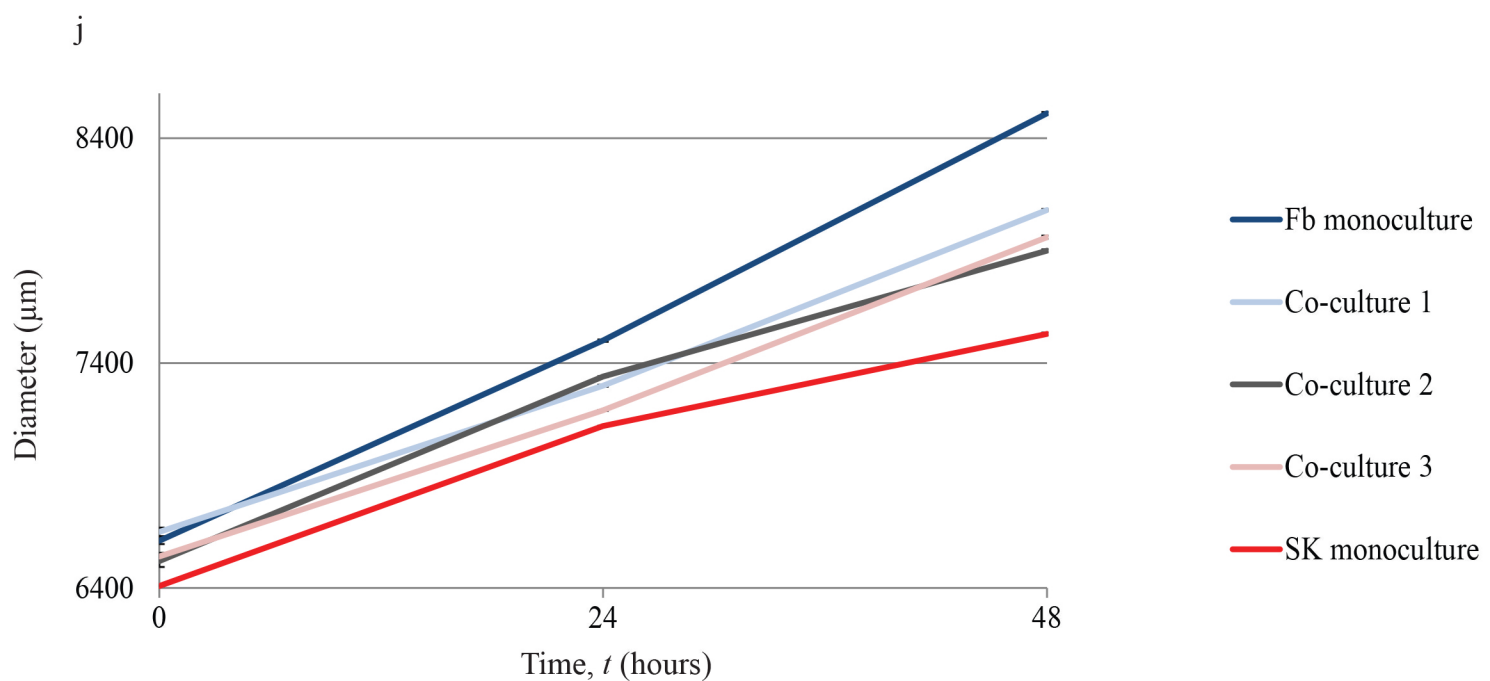

**Fig. 1.** Spatial spreading of cell populations over 48 hours. Images in (a)-(c) show monoculture barrier assays initialised with approximately 20,000 primary fibroblasts (Fb monoculture), (d)-(f) show monoculture barrier assays initialised with approximately 20,000 SK-MEL-28 melanoma cells (SK monoculture), and (g)-(i) show co-culture barrier assays initialised with approximately 10,000 SK-MEL-28 melanoma cells and approximately 10,000 primary fibroblast cells (co-culture 2). Images show the spreading of the population at  $t=0$ , 24 and 48 hours, as indicated. The red outline shows the position of the leading edge detected using ImageJ. Each scale bar is 3000  $\mu\text{m}$ . Data in (j) show the increase in average diameter of the spreading cell populations with time ( $n=3$ ). Each initial ratio of cells is shown using a different colour, as indicated. Co-culture 1 corresponds to experiments initialised with approximately 15,000 primary fibroblasts and approximately 5,000 SK-MEL-28 melanoma cells, co-culture 2 corresponds to experiments initialised with approximately 10,000 primary fibroblasts and approximately 10,000 SK-MEL-28 melanoma cells, and co-culture 3 corresponds to experiments initialised with approximately 5,000 primary fibroblasts and approximately 15,000 SK-MEL-28 melanoma cells.

$t=24$  hours

$t=48$  hours

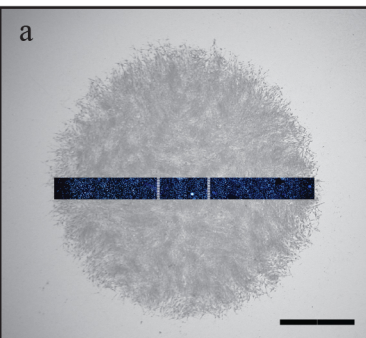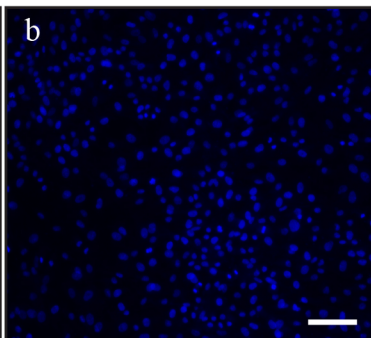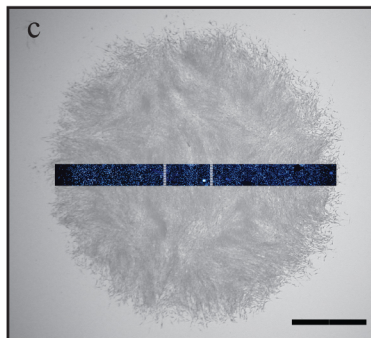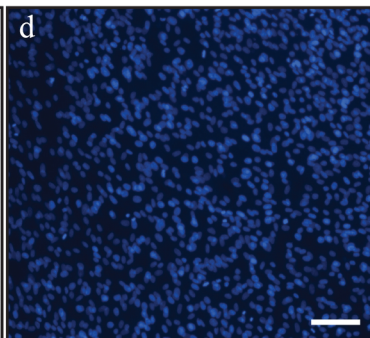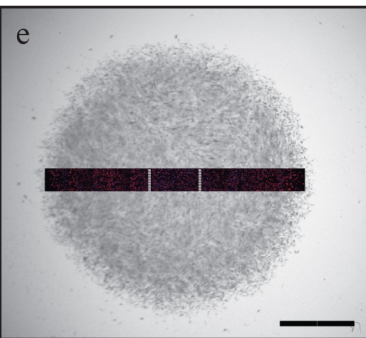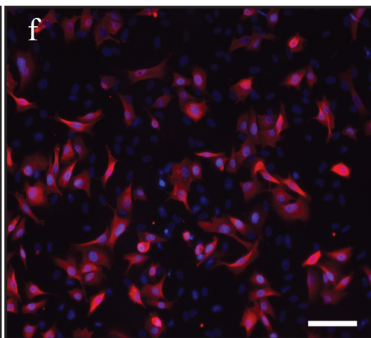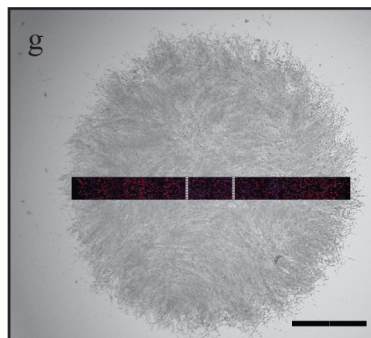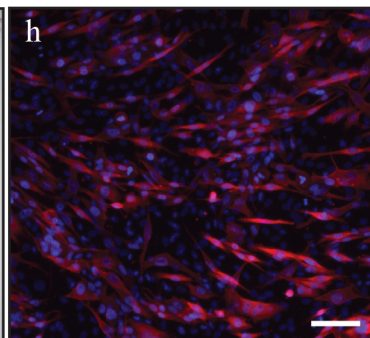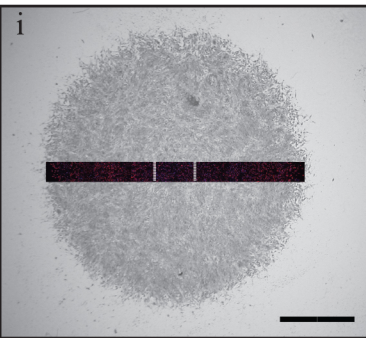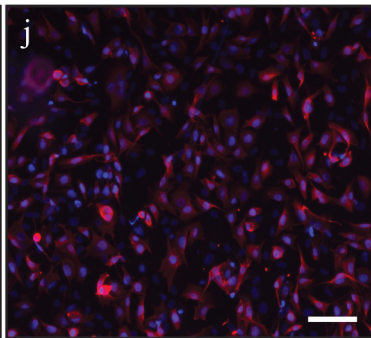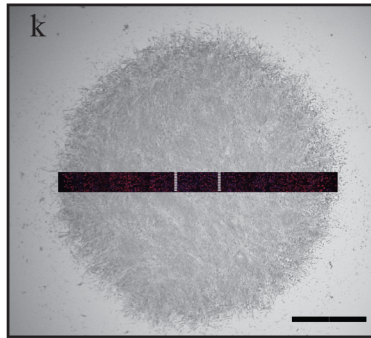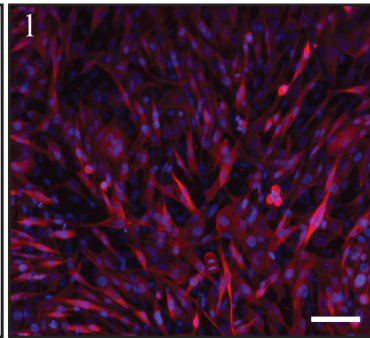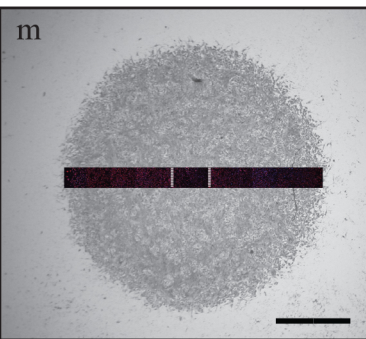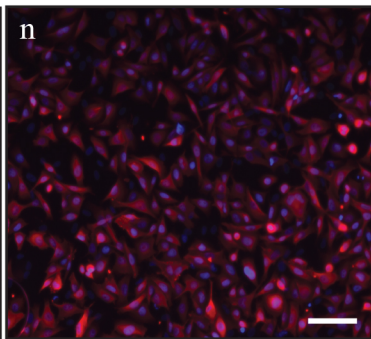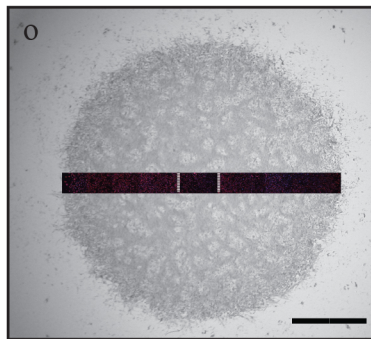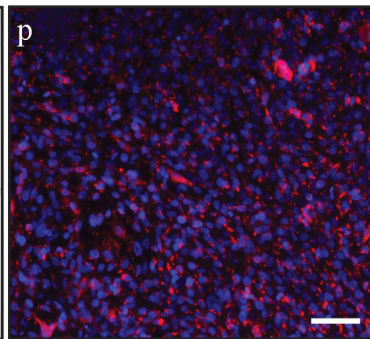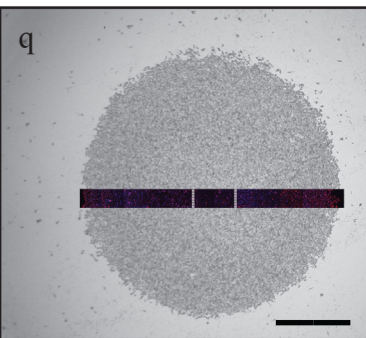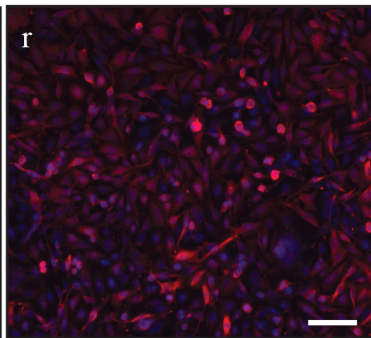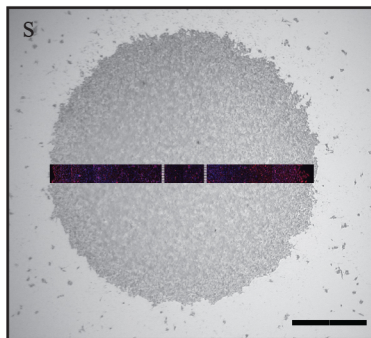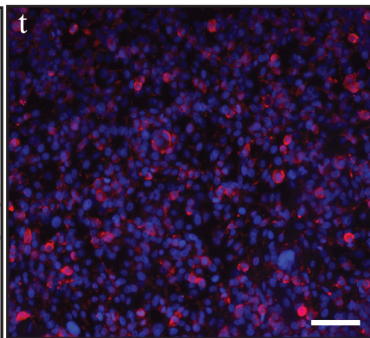



**Fig. 2.** Experimental images of spreading cell populations and corresponding immunofluorescence images to detect the composition of the co-culture assays, at  $t=24$  and 48 hours. The two left-most columns of images correspond to  $t=24$  hours, and the two right-most columns of images correspond to  $t=48$  hours. Results in (a) and (c) correspond to Fb monoculture; (e) and (g) correspond to co-culture 1; (i) and (k) correspond to co-culture 2; (m) and (o) correspond to co-culture 3; and (q) and (s) correspond to SK monoculture, as indicated. A transect showing immunofluorescence staining is superimposed on each greyscale image, and the transect passes through the centre of each spreading population. The vertical white lines on each transect indicates the central region of the transect, and the central regions in (a), (c), (e), (g), (i), (k), (m), (o), (q) and (s) are magnified, and shown in (b), (d), (f), (h), (j), (l), (n), (p), (r) and (t), respectively. In the immunofluorescence images, all cell nuclei (Fb + SK) are stained with *dapi* (blue), whereas just the SK-MEL-28 melanoma cells (SK) are stained with *S100* (red). The scale bar in all greyscale images is 2000  $\mu\text{m}$ , and the scale bar in all immunofluorescence images is 100  $\mu\text{m}$ .

a

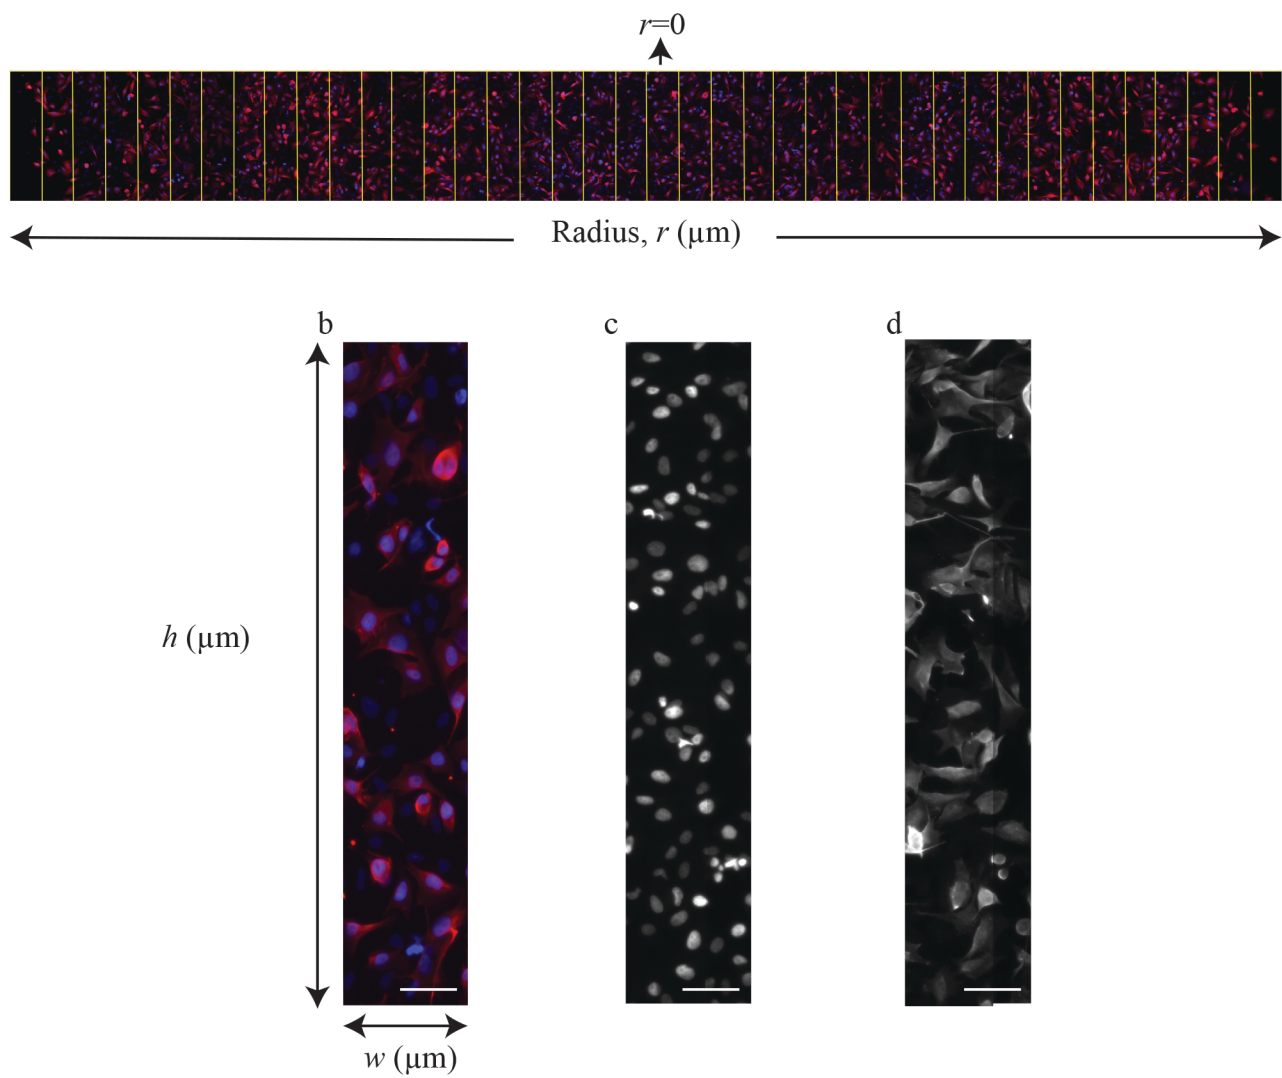

e

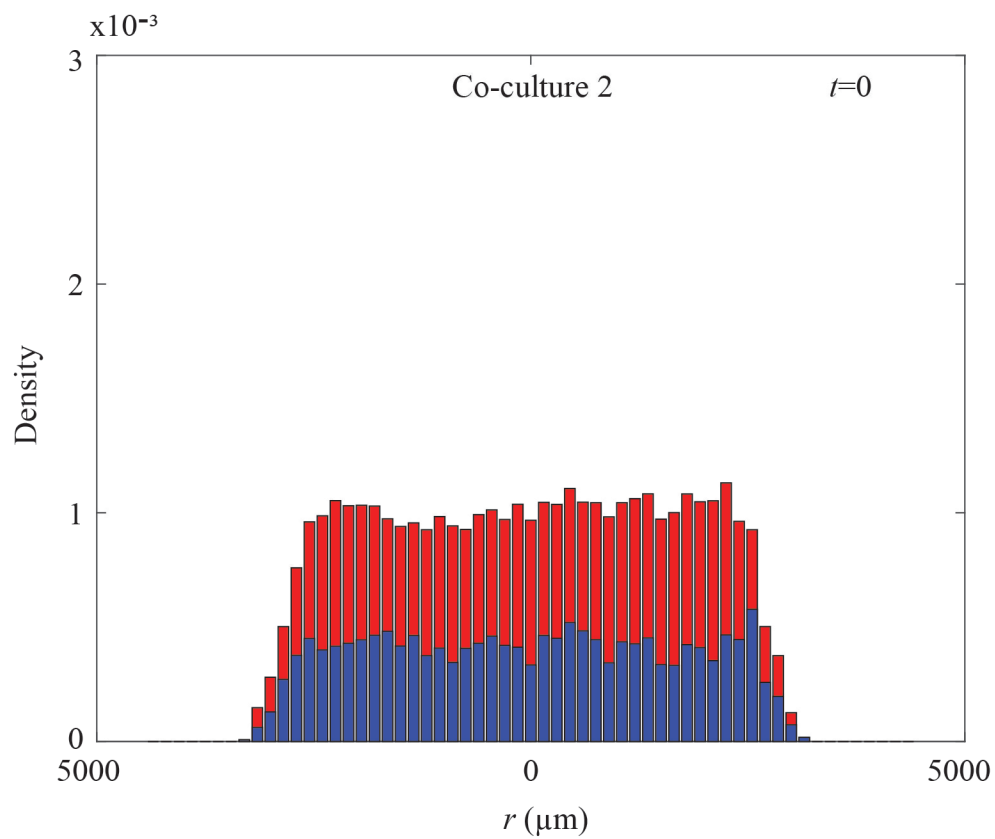

**Fig. 3.** Immunofluorescence staining identifies the spatial and temporal patterns of cell spreading in the co-culture barrier assays. (a) Example transect through the centre of a spreading population. The centre of the population corresponds to  $r=0$ , and the distance from the centre of the population is measured by the radial coordinate,  $r>0$ . Each transect is divided into many equally-spaced subregions, each of width  $w=150\ \mu\text{m}$  and height  $h$ . The value of  $w$  is constant, fixed at  $150\ \mu\text{m}$  in all experiments. However, the height of the subregion,  $h$ , varied between  $622\text{-}817\ \mu\text{m}$  in different experiments, but the height is constant each transect in each particular experiment. To quantify the density of cells across the transect, we count the number of cells of each type in each subregion, and divide by the area of the subregion to give an estimate of the density of each cell type, at each radial position,  $r$ . To count the number of cells in each subregion we use immunofluorescence staining, as shown in (b). The staining in (c) shows *dapi* staining (Fb + SK), whereas the staining in (d) shows *S100* (SK) staining. The number of primary fibroblast cells in each subregion is the difference between the total number of *dapi*-positive nuclei and the number of *S100*-positive cells in each subregion. The scale bar in (b)-(d) is  $100\ \mu\text{m}$ . Using these cell counts, we construct the cell density histogram, as shown in (e), illustrating the spatial variation in cell density at  $t=0$  in an experiment corresponding to co-culture 2. The blue section in the histogram shows the density of primary fibroblast cells, the red section shows the density of SK-MEL-28 melanoma cells, and the total height of the histogram shows the total cell density.

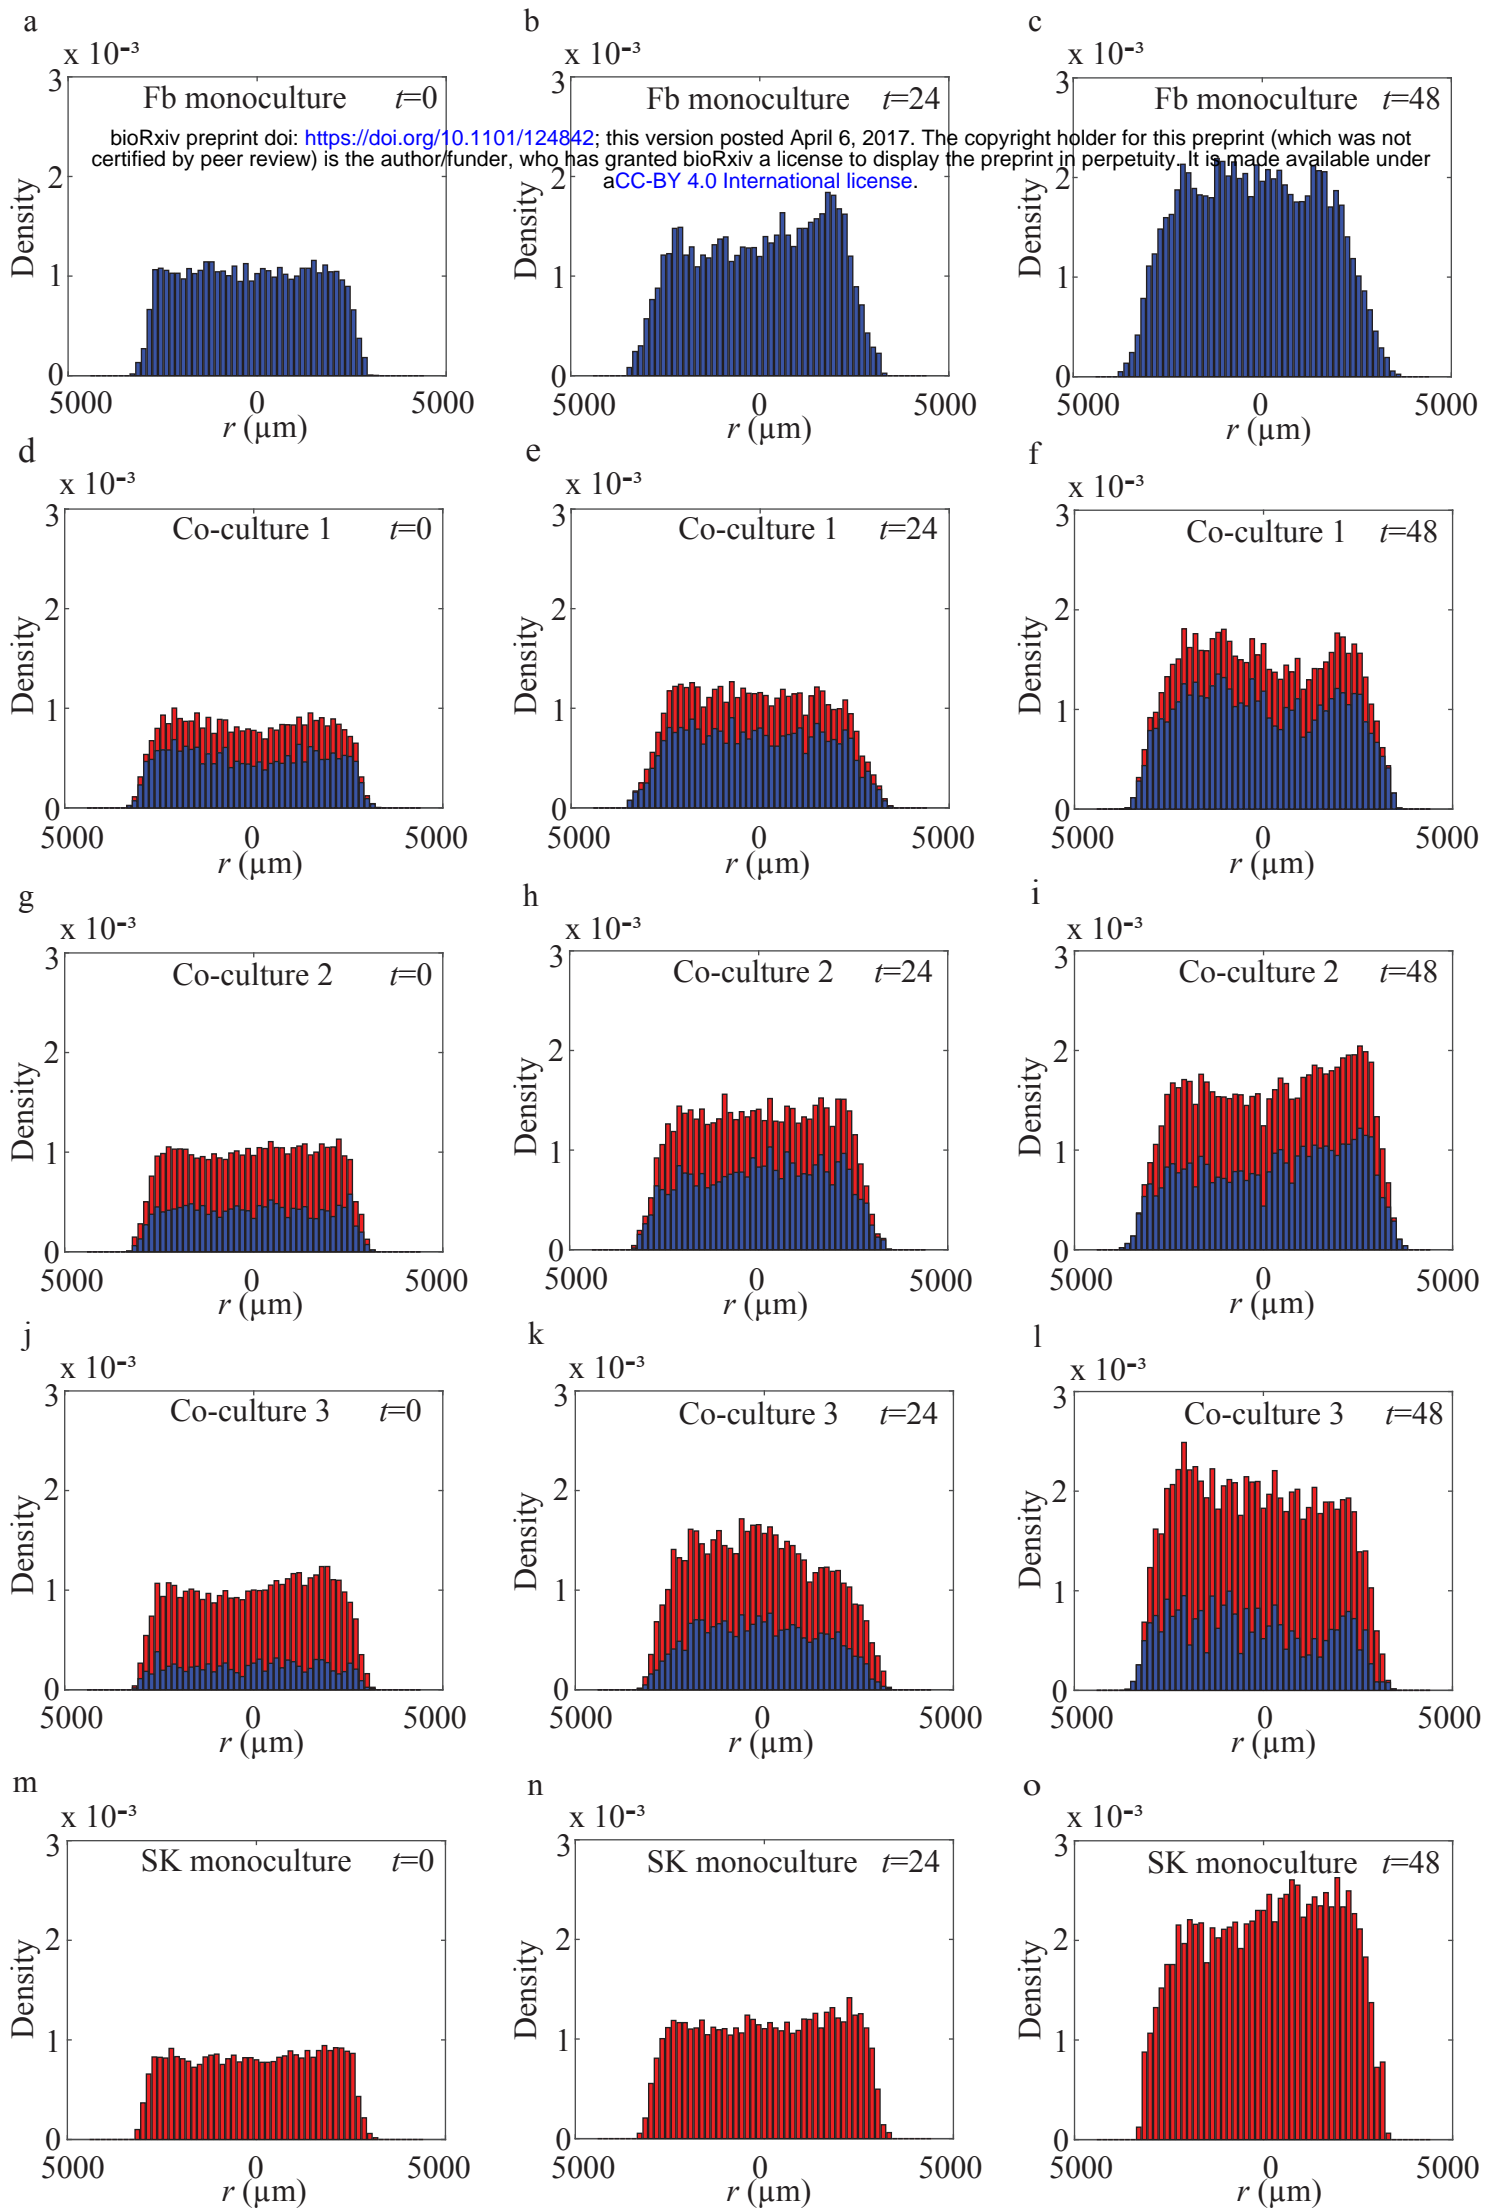

**Fig. 4.** Summary of cell density profiles. Cell density histograms for individual experiments, constructed using the technique presented in Fig. 3, are averaged across three identically prepared experimental replicates ( $n=3$ ) to give a series of averaged cell density histograms. Averaged cell density histograms in (a)-(c) correspond to Fb monoculture; (d)-(f) correspond to co-culture 1; (g)-(i) correspond to co-culture 2; (j)-(l) correspond to co-culture 3; and (m)-(o) correspond to SK monoculture, at  $t=0$ , 24 and 48 hours, as indicated. The blue section in the histogram shows the density of primary fibroblast cells, the red section shows the density of SK-MEL-28 melanoma cells, and the total height of the histogram shows the total cell density.

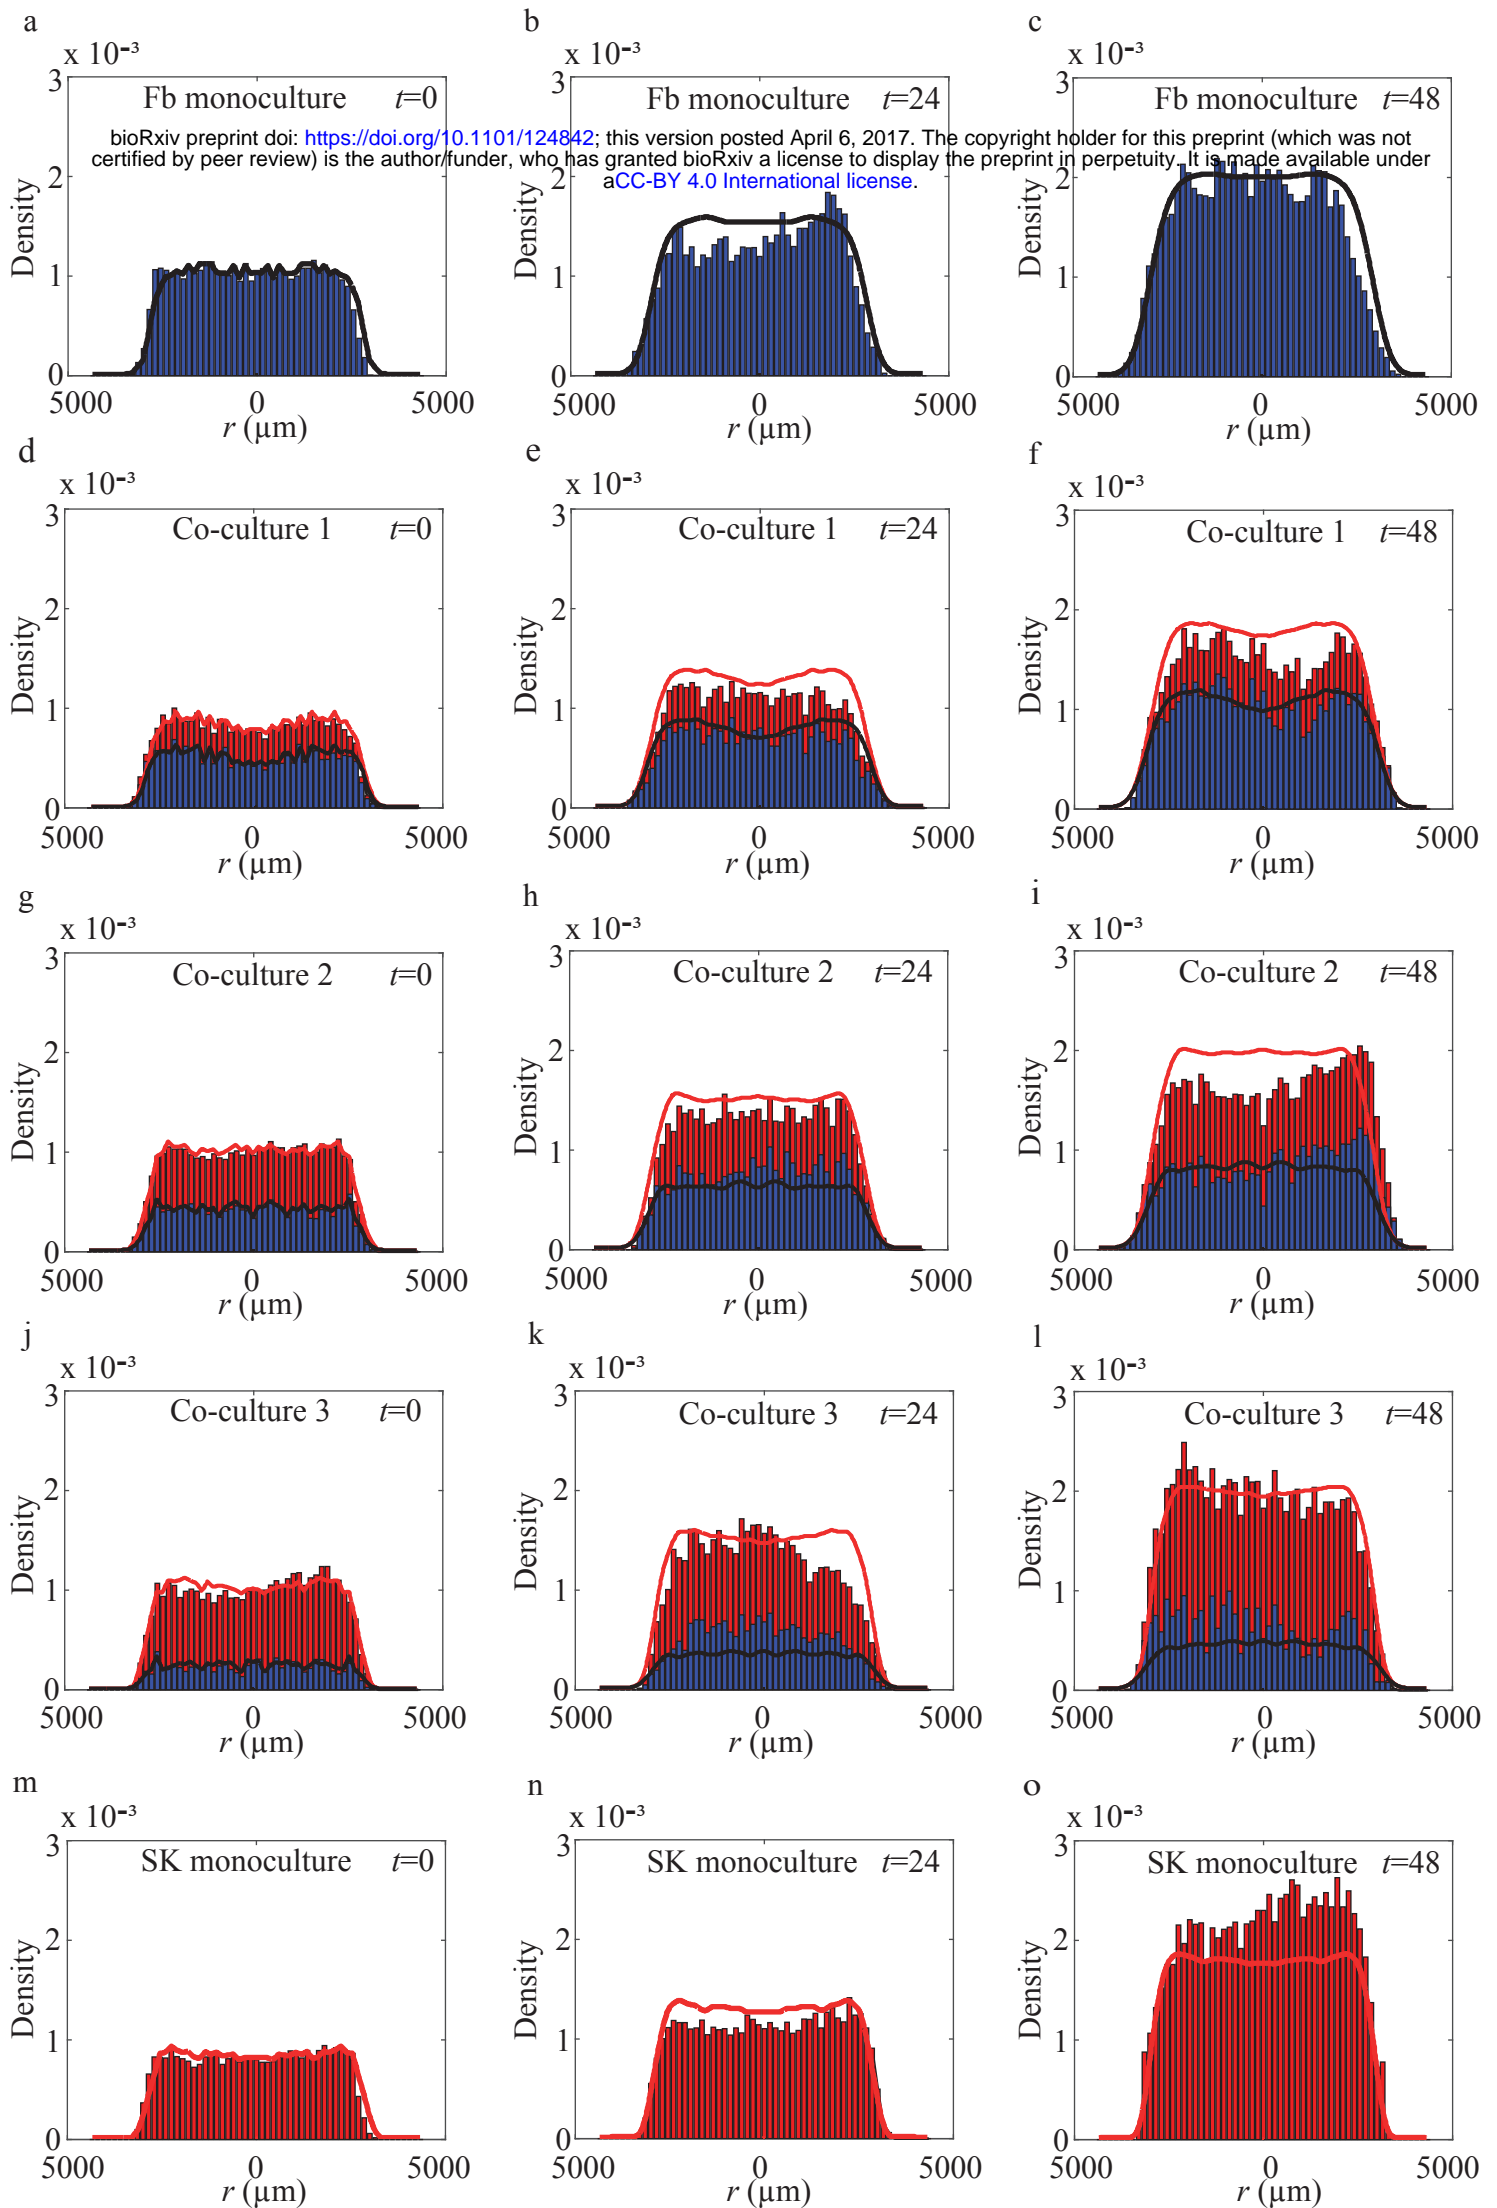

**Fig. 5.** Comparison of average cell density profiles and the solution of the mathematical model, Eq. (1)-(2). The experimental data is presented in the same format as presented in Fig. 4. All experimental data are superimposed with appropriate numerical solutions of Eq. (1)-(2), with  $C_{Fb}(r,t)$  shown in black, and  $S(r,t)$  shown in red, and  $C_{SK}(r,t)$  is the difference between the red curve and the black curve. The initial condition for  $C_{Fb}(r,0)$  and  $S(r,0)$ , shown in (a), (d), (g), (j) and (m), are chosen to match the observed experimental data at  $t=0$ . The parameters used to solve Eq. (1)-(2) are:  $D_{Fb} = 1200 \mu\text{m}^2/\text{hour}$ ;  $D_{SK} = 170 \mu\text{m}^2/\text{hour}$ ;  $\lambda_{Fb} = 0.03 \text{ hour}^{-1}$ ;  $\lambda_{SK} = 0.03 \text{ hour}^{-1}$  and  $K = 2.8 \times 10^{-3} \text{ cells}/\mu\text{m}^2$ . The equations are solved on  $0 < r < 4350 \mu\text{m}$ . Zero flux boundary conditions are implemented at  $r = 0 \mu\text{m}$  and  $r = 4350 \mu\text{m}$ . The numerical solutions of Eq. (1)-(2) are obtained with  $\Delta r = 10 \mu\text{m}$ ,  $\Delta t = 0.1 \text{ hours}$  and  $\varepsilon = 1 \times 10^{-5}$ .
